1 **Dietary Exposure to Antibiotic Residues Facilitates Metabolic**  
2 **Disorder by Altering the Gut Microbiota and Bile Acid Composition**

3 Rou-An Chen<sup>a†</sup>, Wei-Kai Wu<sup>b†</sup>, Suraphan Panyod<sup>a</sup>, Po-Yu Liu<sup>c</sup>, Hsiao-Li  
4 Chuang<sup>d</sup>, Yi-Hsun Chen<sup>c</sup>, Qiang Lyu<sup>e</sup>, Hsiu-Ching Hsu<sup>f</sup>, Tzu-Lung Lin<sup>g</sup>,  
5 Ting-Chin David Shen<sup>h</sup>, Yu-Tang Yang<sup>c</sup>, Hsin-Bai Zou<sup>e</sup>, Huai-Syuan  
6 Huang<sup>a</sup>, Yu-En Lin<sup>a</sup>, Chieh-Chang Chen<sup>i</sup>, Chi-Tang Ho<sup>j</sup>, Hsin-Chih Lai<sup>g</sup>,  
7 Ming-Shiang Wu<sup>c,i</sup>, Cheng-Chih Hsu<sup>e\*</sup> and Lee-Yan Sheen<sup>a,k,l\*</sup>

8 *<sup>a</sup>Institute of Food Science and Technology, National Taiwan University, Taipei,*  
9 *Taiwan; <sup>b</sup>Department of Medical Research, National Taiwan University Hospital,*  
10 *Taipei, Taiwan; <sup>c</sup>Department of Internal Medicine, College of Medicine, National*  
11 *Taiwan University, Taipei, Taiwan; <sup>d</sup>National Laboratory Animal Center, National*  
12 *Applied Research Laboratories, Taipei, Taiwan; <sup>e</sup>Department of Chemistry, National*  
13 *Taiwan University, Taipei, Taiwan; <sup>f</sup>The Metabolomics Core Laboratory, Center of*  
14 *Genomic Medicine, National Taiwan University, Taipei, Taiwan; <sup>g</sup>Department of*  
15 *Medical Biotechnology and Laboratory Science, College of Medicine, Chang Gung*  
16 *University, Taoyuan, Taiwan; <sup>h</sup>Division of Gastroenterology, Perelman School of*  
17 *Medicine, University of Pennsylvania, Pennsylvania, USA; <sup>i</sup>Department of Internal*  
18 *Medicine, National Taiwan University Hospital, Taipei, Taiwan; <sup>j</sup>Department of Food*  
19 *Science, Rutgers University, New Brunswick, New Jersey, USA; <sup>k</sup>Center for Food and*  
20 *Biomolecules, National Taiwan University, Taipei, Taiwan; <sup>l</sup>National Center for Food*  
21 *Safety Education and Research, National Taiwan University, Taipei, Taiwan*

22

23 <sup>†</sup>These authors contributed equally for the study.

24 **\*Corresponding authors:**

25 Lee-Yan Sheen, No. 1, Sec. 4, Roosevelt Rd., Taipei, Taiwan 10617; Tel: 886-2-  
26 33661572; E-mail: [lysheen@ntu.edu.tw](mailto:lysheen@ntu.edu.tw)

27 Cheng-Chih Hsu, No. 1, Sec. 4, Roosevelt Rd., Taipei, Taiwan 10617; Tel.: 886-  
28 33661681; E-mail: [ccrhsu@ntu.edu.tw](mailto:ccrhsu@ntu.edu.tw)

29

## 30 **Dietary Exposure to Antibiotic Residues Facilitates Metabolic** 31 **Disorder by Altering the Gut Microbiota and Bile Acid Composition**

32 **Abstract:** Antibiotics used as growth promoters in livestock and animal  
33 husbandry can be detected in animal-derived food. Epidemiological studies have  
34 implicated that exposure to these antibiotic residues in food may be associated to  
35 childhood obesity. Herein, the effect of exposure to residual dose of tylosin—an  
36 antibiotic growth promoter—on host metabolism and gut microbiota was  
37 explored *in vivo*. Theoretical maximal daily intake (TMDI) doses of tylosin were  
38 found to facilitate high-fat diet-induced obesity, induce insulin resistance, and  
39 perturb the composition of gut microbiota in mice. The obesity-related  
40 phenotypes were transferrable to germ-free recipient mice, indicating that the  
41 effects of TMDI dose of tylosin on obesity and insulin resistance occurred mainly  
42 via alteration of the gut microbiota. Tylosin TMDI exposure restricted to early  
43 life, which is the critical period of gut microbiota development, altered the  
44 abundance of specific bacteria related to host metabolic homeostasis later in life.  
45 Moreover, early-life exposure to tylosin TMDI was sufficient to modify the ratio  
46 of primary to secondary bile acids, thereby inducing lasting metabolic  
47 consequences via the downstream FGF15 signaling pathway. Altogether, these  
48 findings demonstrate that exposure to very low dose of antibiotic residues,  
49 whether continuously or in early life, can exert long-lasting effects on host  
50 metabolism by altering gut microbiota and its metabolites.

51 **Importance:** Evidence has indicated that chronic exposure to antibiotic residues  
52 in food could contribute to obesity. However, few studies have investigated the  
53 effect of chronic exposure to very low-dose antibiotic residue in food (~1000-fold  
54 lower than the therapeutic dose) on gut microbiota and host metabolism. Our  
55 study demonstrates that even with limited exposure in early life, a residual dose  
56 of tylosin causes lasting metabolic disturbances through altering gut microbiota  
57 and its metabolites. Our findings reveal that the gut microbiota is susceptible to  
58 previously ignored environmental factors.

59 **Keywords:** bile acid metabolism; dietary exposure; early life; food safety; gut  
60 microbiota; low-dose antibiotic; metabolic disorder; obesity

## 61 **Introduction**

62 Antibiotics administrated at sub-therapeutic doses have been used as growth promoters  
63 since 1940s (1-3). According to the U.S. Food and Drug Administration, approximately  
64 two-thirds of all antimicrobial agents used in the United States are for livestock and  
65 animal husbandry, driven by the demand to improve the production of animal-derived  
66 foods (4). Antibiotics used in livestock may remain in animal-derived foods and  
67 contribute to inadvertent antibiotic residue consumption by humans. To avoid potential  
68 health hazards to consumers, the Joint FAO/WHO Expert Committee on Food  
69 Additives evaluated and provided the maximum residue limits (MRLs) for veterinary  
70 antibiotic residues permitted in food (5). The MRLs were determined based on  
71 acceptable daily intake (ADI) that should be harmless to humans according to results  
72 from extensive toxicity studies. However, these studies did not evaluate animal models  
73 of chronic metabolic diseases and were designed without considering the effects of  
74 antibiotic residues on gut microbiota and microbial metabolites, thereby failing to  
75 establish tolerable levels for the gut microbiota that can affect health of the host and  
76 cause disease.

77 Previous studies reported that antibiotics remained in meat, eggs, milk, and  
78 seafood products (6-8), sometimes even at levels exceeding the MRLs (9). Moreover,  
79 cooking processes, such as frying and roasting, can increase the concentrations of  
80 certain antibiotics (7), raising the probability of exposure to antibiotic residues through  
81 food. Therefore, veterinary antibiotics can be detected in human urine due to the  
82 consumption of pork, chicken, and dairy products (8). Furthermore, higher levels of  
83 veterinary antibiotics detected in the urine were reported to be positively correlated with  
84 obesity in children, revealing that exposure to antibiotic residues in food may contribute  
85 to obesity (10).

86           The commensal bacteria play a crucial role in human health and disease mainly  
87 by producing various metabolites, such as short-chain fatty acids (SCFAs) and  
88 secondary bile acids (11). Indeed, dysbiosis of the gut microbiota and microbial  
89 metabolites have been associated with metabolic diseases (12, 13). Antibiotics  
90 significantly disturb the composition of the gut microbiota, alter SCFAs and bile acids,  
91 as well as their signaling pathways, thereby leading to metabolic consequences (14-16).  
92 Hence, considering their importance in treating infections, antibiotics can be viewed as  
93 a double-edged sword for human health given their untoward effects on the gut  
94 microbiota and host metabolic homeostasis (17).

95           The gut microbial community is dynamic and susceptible to environmental  
96 shifts in early life, which has been considered the critical window of gut microbiota  
97 development (18). Clinical studies reported that antibiotic exposure during infancy is  
98 associated with increased risks of being overweight and obese (19-22). Moreover,  
99 studies in mice showed that early-life antibiotic exposure disturbs the colonization and  
100 maturation of the intestinal microbiota, leading to lasting effects on the metabolism of  
101 the host (23-25), even when the antibiotic is administered at sub-therapeutic doses (18,  
102 26, 27). The abovementioned evidence demonstrate that low-dose antibiotic exposure,  
103 especially in early life, is sufficient to induce undesirable metabolic consequences.  
104 Along with the findings of epidemiological studies, low dose veterinary antibiotic  
105 residues in food are believed to potentially promote obesity via gut microbiota  
106 perturbation. However, the impact of residual dose of antibiotics on the gut microbiota  
107 and human health has not been elucidated (3, 28).

108           In this study, the impact of ADI and theoretical maximum daily intake (TMDI)  
109 dosage of tylosin—used as a model antibiotic growth promoter owing to its frequent use  
110 and residual detection in food—on host metabolism and gut microbiota was explored in

111 mice. ADI can be safely consumed daily over life without any appreciable health risk  
112 (29), whereas TMDI is the estimation of the maximal residual dose that can be  
113 consumed from foods according to MRL (5). To study the effect of tylosin-altered  
114 microbiota on obesity-related phenotypes, fecal samples were transplanted from mice  
115 fed TMDI dose of tylosin into germ-free mice. In addition, whether early-life exposure  
116 to TMDI dose of tylosin could induce obesity-related complications and cause  
117 alterations in gut microbiota and microbial metabolites was also investigated. Finally, a  
118 plausible mechanism by which tylosin TMDI dose induced metabolic consequences via  
119 altering bile acid composition and the ileal fibroblast growth factor 15 (FGF15)/hepatic  
120 fibroblast growth factor receptor 4 (FGFR4) pathway.  
121

## 122 **Results**

### 123 *Residual doses of tylosin facilitate obesity preferentially in high-fat diet-fed* 124 *mice*

125 To investigate whether chronic exposure to an acceptable or residual dose of antibiotic  
126 could cause obesity, and the potential synergistic effects of antibiotics and diet on host  
127 metabolism, a murine model that included two doses of antibiotic (tylosin at ADI and  
128 TMDI dose) and different diets (normal chow diet [NCD] and high-fat diet [HFD]) was  
129 designed (**Fig. 1a**).

130 Compared with NCD-CON (non-exposed/control) mice, NCD-ADI and NCD-  
131 TMDI mice showed significantly greater weight gain from weaning to 5 weeks of age.  
132 NCD-ADI mice also showed more weight gain from weeks 13 to 15 (**Fig. 1b**), but no  
133 significant changes in relative fat and lean mass were observed among the NCD groups  
134 (**Fig. 1d, e**). In contrast, HFD-ADI and HFD-TMDI mice exhibited significantly  
135 increased weight gain compared with HFD-CON group throughout the experiment from  
136 weaning to 17 weeks of age (**Fig. 1c**). Body composition analysis showed that HFD-  
137 ADI and HFD-TMDI mice had increased relative fat mass at weeks 8, 12, and 17  
138 compared with HFD-CON mice (**Fig. 1f**), while HFD-TMDI mice also had decreased  
139 relative lean mass (**Fig. 1g**). These results demonstrate that tylosin-induced adiposity is  
140 evident early in life with both NCD and HFD, but continuous effect of tylosin-induced  
141 adiposity requires concomitant HFD.

### 142 *Residual doses of tylosin exacerbate HFD-induced hepatic steatosis, adiposity,* 143 *and insulin resistance*

144 Antibiotics have been shown to induce obesity, nonalcoholic fatty liver disease  
145 (NAFLD), and insulin resistance (30). Given that tylosin increased the fat mass in HFD-

146 fed mice but not in NCD-fed mice, additional investigations in the HFD-fed mice were  
147 conducted.

148 HFD-TMDI mice showed increased visceral fat, including epididymal and  
149 perinephric adipose tissues (**Fig. 2a, b**). HFD-ADI and HFD-TMDI mice also showed  
150 adipocyte hypertrophy (**Fig. 2c**) and elevated adipocyte size (**Fig. 2e**) compared with  
151 HFD-CON mice. Histological examination of the liver revealed that tylosin-treated  
152 mice exhibited increased lipid droplet formation (**Fig. 2d**), higher number of  
153 inflammatory foci, and fatty liver score (**Fig. 2f**), suggesting that residue levels of  
154 tylosin caused more severe NAFLD. No change in plasma total triacylglycerol,  
155 cholesterol, and lipopolysaccharides (LPS) was observed (**Fig. S2b, c, and g**). The oral  
156 glucose tolerance test (OGTT) indicated that HFD-ADI and HFD-TMDI mice exhibited  
157 a trend toward higher plasma glucose during OGTT (**Fig. S2a**), OGTT<sub>AUC</sub> (**Fig. 2g**),  
158 and fasting glucose (**Fig. 2h**). The fasting insulin and the homeostasis model assessment  
159 of insulin resistance (HOMA-IR) index were also elevated in HFD-ADI mice compared  
160 with HFD-CON mice (**Fig. 2i, j**). These results reveal that even residues of tylosin can  
161 induce adverse effects on metabolism when an HFD is consumed.

### 162 *Early-life exposure to residual doses of tylosin alter the gut microbiota* 163 *composition*

164 Sub-therapeutic antibiotic treatment was previously shown to disrupt the development  
165 and maturation of the gut microbiota with metabolic consequences (18, 24, 25, 27, 30).  
166 Thus, sequencing of fecal *16S* rRNA was performed in mice at 3 (weaning), 8, and 17  
167 weeks of age to investigate changes in the gut microbiota. Compared with HFD-TMDI  
168 and HFD-CON mice, HFD-ADI mice showed a significant reduction in the Shannon  
169 Index at 3 weeks that dramatically increased during weeks 3–17 (**Fig. 3a**). Principal  
170 coordinate analysis (PCoA) based on Bray-Curtis dissimilarity revealed that the

171 microbiomes of NCD and HFD mice were clustered separately (**Fig. S3a**), indicating  
172 that diet may be the most important factor influencing the composition of the gut  
173 microbiota. Tylosin also influenced the gut microbiota composition in both NCD-fed  
174 and HFD-fed mice, with greater shifts when administered at higher doses (**Fig. S3b, c**).  
175 The effect of tylosin was most evident on the immature early-life gut microbiota at  
176 week 3, with gradual maturation and clustering of the gut microbiota at weeks 8 and 17,  
177 respectively ( $p < 0.05$ ; **Fig. 3b, c and Fig. S3c–e**). These results suggest that residual  
178 dose of tylosin impacts on the gut microbiota composition in early life, but the gut  
179 microbiota could subsequently mature and recover.

180 Linear discriminant analysis effect size (LEfSe) analysis and volcano plot were  
181 performed to elucidate the relative abundances of bacterial taxa that significantly  
182 differed with and without tylosin exposure. *Gammaproteobacteria*, comprising bacterial  
183 taxa generally regarded as LPS-producing pathogens (31), were more abundant in both  
184 HFD-ADI and HFD-TMDI groups than in HFD-CON group (**Fig. 3d and Fig. S4a**).  
185 *Tyzzarella*, reported as a key bacterial taxon associated with infant antibiotic exposure-  
186 related obesity, was enriched in HFD-TMDI mice (20). In turn, bacterial taxa within the  
187 beneficial *Actinobacteria* phylum, particularly *Bifidobacterium* species, were more  
188 abundant in HFD-CON mice (**Fig. S4b**). Volcano plot revealed that *Oscillibacter* spp.,  
189 which has been associated with obesity and intestinal permeability (32), was  
190 significantly enriched in HFD-TMDI mice, whereas *Bifidobacterium* spp. was  
191 significantly reduced in HFD-TMDI mice (**Fig. 3e**). Moreover, *Lactobacillus* and  
192 *Candidatus arthromitus*, which have been associated with obesity prevention (18), were  
193 significantly decreased in HFD-ADI and HFD-TMDI mice (**Fig. 3f, g**). These results  
194 demonstrate that TMDI dose of tylosin depleted the beneficial bacteria and enriched the  
195 pathogenic bacteria. Correlation analysis between the beta diversity (PCoA1 index) of



196 gut microbiota and obesity index (PC1 based on the obesity-related parameters; **Fig. 3h**)  
197 exhibited a positive correlation, suggesting that the gut microbiota alteration is involved  
198 in the obesity and metabolic disorder phenotypes.

### 199 *Fecal microbiota transplantation from HFD-TMDI mice induce adiposity and* 200 *insulin resistance in germ-free mice*

201 To further investigate whether residual tylosin exposure could facilitate obesity through  
202 the alternation of gut microbiota, fecal microbiota transplantation (FMT) was performed  
203 (**Fig. 4a**). Considering that TMDI dose can better simulate human exposure to  
204 antibiotics in food, feces from HFD-TMDI mice were transplanted to germ-free mice.

205 Compared with germ-free mice that received feces from HFD-CON mice (FMT-  
206 CON), the HFD-TMDI recipient mice (FMT-TMDI) showed higher body weight at 11,  
207 12, 13, 14 weeks of age (**Fig. 4b**), increased weight gain during weeks 8–10 (**Fig. 4c**),  
208 and elevated fat mass at week 20 (**Fig. 4d**), indicating that the microbiome from HFD-  
209 TMDI mice increased the adiposity of the recipient mice. Additionally, HFD-TMDI  
210 mice exhibited increased plasma glucose during OGTT, OGTT<sub>AUC</sub>, and HOMA-IR  
211 index (**Fig. 4e-g**). The intestinal permeability measurement by fluorescein  
212 isothiocyanate-dextran revealed increased permeability in FMT-TMDI mice, although  
213 differences in plasma LPS levels were not observed between the two groups. (**Fig. S5f,**  
214 **g**). Thus, TMDI dose of tylosin-altered microbiota induced the metabolic phenotype of  
215 obesity and insulin resistance in germ-free recipient, indicating that the microbiota play  
216 a causative role in tylosin TMDI-induced metabolic disorders.

### 217 *Exposure to TMDI dose of tylosin in early life is sufficient to cause lasting* 218 *metabolic complications*

219 Accumulating evidence indicates that antibiotic exposure in early life, which is the

220 critical developmental period of gut microbiota, causes obesity later on (19-22). Results  
221 of our first experiment showed that 3-week-old HFD-TMDI mice exhibited increased  
222 body weight (**Fig. 1b, c**), indicating that early-life exposure to residual dose of tylosin  
223 induces weight gain. Accordingly, an early-exposure experiment was conducted to  
224 investigate the influence of early-life exposure to tylosin TMDI on obesity-related  
225 phenotypes and the gut microbiota (**Fig. 5a**).

226 Cont-TMDI mice, which were continuously exposed to tylosin TMDI  
227 throughout the experimental period, displayed continuously elevated body weight,  
228 relative fat mass (**Fig. 5b, c**), weight of visceral fat mass, and OGTT<sub>AUC</sub> (**Fig. 5d, e**)  
229 compared with HFD-CON. Remarkably, Early-TMDI mice, which were exposed to  
230 tylosin TMDI during pregnancy and nursing period, also showed a constant increase in  
231 body weight, relative fat mass, fasting insulin, and HOMA-IR (**Fig. 5b-g**) after  
232 cessation of tylosin exposure. These findings suggest that exposure to residual dose of  
233 antibiotics from food early in life, can have long-lasting effect on metabolism and lead  
234 to obesity.

235 *Early exposure to TMDI dose of tylosin alter the abundance of specific bacteria*  
236 *related to the metabolic homeostasis of the host*

237 The overall gut microbiota composition based on PCoA of Bray-Curtis distances  
238 showed that tylosin influenced the gut microbiota composition at weeks 5 and 20 ( $p <$   
239  $0.05$ ) (**Fig. 5h**). Compared with CON mice, Cont-TMDI mice showed a greater  
240 difference than Early-TMDI mice, suggesting that continuous exposure to tylosin  
241 modified the overall gut microbiota composition more than exposure restricted to early  
242 life. Furthermore, Early-TMDI vs. CON group exhibited more differences at week 5  
243 than at week 20, possibly due to maturation of the gut microbiota (**Fig. 5h**).

244 Since both Early-TMDI and Cont-TMDI mice displayed shifts in microbial

245 composition at 20 weeks of age ( $p < 0.05$ ), bacterial taxa that differed in relative  
246 abundances from CON mice were identified and examined their association with  
247 obesity-related phenotypes. Overall, 32 bacterial genera were found to be significantly  
248 altered by early or continuous exposure to tylosin TMDI (**Fig. 6**). Despite  
249 discontinuation of tylosin exposure in Early-TMDI mice at 3 weeks of age, several  
250 bacterial genera remained altered at week 20. Interestingly, bacterial genera that were  
251 increased in both Early-TMDI and Cont-TMDI mice, including *Anaerofustis*,  
252 demonstrated a significant positive correlation with obesity-related phenotypes (**Fig. 6**).  
253 In contrast, genera that were depleted in both Early-TMDI and Cont-TMDI, including  
254 bacteria within *Lachnospiraceae* and *Ruminococcaceae* families, exhibited a significant  
255 negative correlation with obesity-related phenotypes (**Fig. 6**). These findings indicate  
256 that exposure to residual dose of tylosin influences the abundance of specific bacteria  
257 involved in the regulation of the metabolic homeostasis of the host, even when the  
258 exposure is limited to early life.

259 ***Exposure to TMDI dose of tylosin alter the composition of short-chain fatty***  
260 ***acids and the conversion of bile acids with downstream effects on the FGF15***  
261 ***signaling pathway***

262 We further investigated the effect of TMDI dose of tylosin on major microbial  
263 metabolites including SCFAs and bile acids, which play a role in metabolic homeostasis  
264 by affecting multiple receptors and downstream signaling pathways. Propionic acid and  
265 butyric acid, two main SCFAs, were reduced in Cont-TMDI mice (**Fig. 7a**). The  
266 duration of tylosin exposure influenced SCFA composition. For example, Early-TMDI  
267 mice only exhibited significant reduction in isobutyrate, whereas Cont-TMDI mice  
268 exhibited significant reductions in both branched-chain isobutyric acid and isovaleric  
269 acid (**Fig. 7a**).

270           The total amount of bile acids and the ratio of conjugated to unconjugated bile  
271 acids were not changed by tylosin (**Fig. S7a and b**). However, the ratio of primary bile  
272 acids (PBA) to secondary bile acids (SBA) was significantly increased in Cont-TMDI  
273 mice, with a trend toward increase in Early-TMDI mice (**Fig. 7b**). A correlation  
274 analysis between the PBA/SBA ratio and obesity index showed a moderate trend (**Fig.**  
275 **S7h**). Detected bile acids were classified based on their metabolic pathway (33) into  
276 non-12-OH bile acids (**Fig. 7c**), muricholic acids (MCA; **Fig. 7d**), and 12-OH bile acids  
277 (**Fig. S7c**).  $\beta$ -MCA (**Fig. 7d**), the unconjugated PBA, was significantly increased,  
278 whereas ursodeoxycholic acid and  $\omega$ -MCA (**Fig. 7c, d**), the unconjugated SBA, were  
279 decreased in tylosin-treated mice, possibly due to the inhibition of bacteria involved in  
280 epimerization and dihydroxylation of PBAs, such as *Clostridia*, *Peptostreptococcus*,  
281 *Bifidobacterium*, and *Lactobacillus* (**Fig. S7d–g**) (34). These results revealed that the  
282 increased PBA/SBA ratio caused by tylosin TMDI might be related to obesity.

283           Given that the alternation of PBA/SBAa ratio contributes to plasma FGF15, an  
284 insulin-like hormone secreted in the ileum (35, 36), and regulates hepatic lipid and  
285 glucose metabolism by binding to FGFR4 (37, 38), the FGF15/FGFR4 signaling  
286 pathway was explored next. Tylosin was found to inhibit the conversion of PBA to  
287 SBA, and reduce ileal FGF15 expression (**Fig. 7e and fig. S7i**) and portal vein FGF15  
288 levels (**Fig. 7f**) with subsequent reduction in hepatic FGFR4 (**Fig. 7g**); thus, potentially  
289 affecting hepatic insulin sensitivity and lipid metabolism. Collectively, these results  
290 showed that TMDI dose of tylosin alter the intestinal microbiome and bile acid  
291 metabolism with downstream effects on the farnesoid X receptor signaling pathway,  
292 decreasing bile acid-related FGF15 levels and leading to obesity-related metabolic  
293 dysfunction (**Fig. 8**).

294

## 295 Discussion

296 Previous studies indicated that sub-therapeutic antibiotic treatment and low-dose  
297 penicillin led to obesity and NAFLD (18, 27, 30). The TMDI dose, which is used for  
298 simulating the ingestion of antibiotic residues through food consumption in the present  
299 study, was 20-fold lower than low-dose penicillin and 425-fold lower than the growth-  
300 promoting dose used in food animals (18, 39). Herein, ADI and TMDI doses of tylosin  
301 were shown to induce obesity, fatty liver, and insulin resistance in HFD mice (**Figs. 1**  
302 **and 2**). Despite its extremely low dose, tylosin TMDI significantly enhanced fat  
303 accumulation and insulin resistance, suggesting that continuous exposure to very low  
304 dose antibiotic residues in food can affect human metabolism. Interestingly, mice  
305 administered tylosin on the NCD did not exhibit increased fat mass. One plausible  
306 explanation is that tylosin amplified the effect of dysbiosis caused by the HFD.  
307 Moreover, Early-TMDI mice exhibited increased weight, fat mass, and insulin  
308 resistance index at 20-week old, despite the administration of TMDI dose of tylosin was  
309 ceased at weaning. Hence, these findings suggest that early exposure to antibiotic  
310 residue has a long-lasting effect on metabolism.

311 The diversity analysis of gut microbiota observed indicates a dose-dependent  
312 effect of tylosin on the gut microbiota composition (**Fig. 3a–c**) and reveals that  
313 continuous tylosin exposure has a more significant effect compared to exposure  
314 restricted to early life (**Fig. 5h**). Interestingly, compared with CON mice, Early-TMDI  
315 mice exhibited a more similar microbial community at week 20 than at week 5 based on  
316 PCoA (**Fig. 5h**), but fat mass was more significantly increased at 20 weeks of age (**Fig.**  
317 **5c**). This finding suggests that the impaired metabolic phenotype can persist despite  
318 recovery of the microbiota, consistent with findings from previous investigations (18).  
319 In addition, minor disruption of the microbiota seems to be sufficient for inducing

320 significant adiposity (24).

321 The altered abundance of specific bacterial taxa correlates with obesity-related  
322 phenotypes (**Fig. 6**). Overall, genera enriched in Early-TMDI and Cont-TMDI mice  
323 were found to be positively correlated with obesity and insulin resistance, whereas those  
324 depleted in Early-TMDI and Cont-TMDI mice were negatively correlated. These  
325 bacteria have been found to be related to obesity in previous studies. For instance,  
326 *Anaerofustis*, the tylosin-enriched bacterium, was found to be increased in obese  
327 humans (40). In turn, the tylosin-depleted *Ruminococcaceae* and *Lachnospiraceae* were  
328 found to be associated with a lower longitudinal weight gain (41). These findings  
329 indicate that despite discontinuation of TMDI-tylosin at 3 weeks of age, several genera  
330 related to host metabolism remained altered at 20 weeks of age. Therefore, colonization  
331 could be perturbed by exposure to a very low dose of antibiotic residue early in life,  
332 which can in turn contribute to metabolic disorders in adulthood (18, 26, 42, 43).

333 Herein, a metabolomic analysis revealed that TMDI dose of tylosin modified  
334 both SCFAs and bile acids. Cont-TMDI mice showed decreased isobutyric acid and  
335 isovaleric acid, which were reported to improve insulin-stimulated glucose uptake and  
336 enhance insulin sensitivity (44). Additionally, Cont-TMDI mice showed a reducing  
337 trend of butyric acid and propionic acid, which were associated with enhanced intestinal  
338 barrier function and insulin sensitivity (11, 45). Reduction of SCFAs could have  
339 contributed to the depletion of *Lachnospiraceae* and *Ruminococcaceae* in Early-TMDI  
340 and Cont-TMDI mice (40), and the observed increased PBA/SBA ratio may be caused  
341 by the broad inhibition of specific bacteria related to the conversion of PBA (**Fig. 6**).

342 Increased PBA/SBA ratio has been associated with decreased insulin sensitivity  
343 in patients with NAFLD or nonalcoholic steatohepatitis (46, 47). In this study, tylosin  
344 TMDI-treated mice showed increased PBA/SBA ratio, lower FGF15 levels in the ileum

345 and portal vein, thereby decreasing the expression of hepatic FGFR4, which may cause  
346 metabolic disorders by affecting metabolism-related signaling pathways in the liver (37,  
347 38, 48). Consistent with these observations, antibiotics were reported to increase the  
348 PBA/SBA ratio, with subsequently decreased plasma FGF19 (human orthologue of  
349 FGF15) and peripheral insulin sensitivity (14).

350 This study has some limitations. The *in vivo* effects of tylosin, a macrolide  
351 antibiotic growth promoter, on the gut microbiota and the obesity phenotype were  
352 demonstrated. However, exposure to alternative antibiotics may lead to different  
353 outcomes owing to the specific antimicrobial action and spectrum of each antibiotic.  
354 Moreover, the human dietary pattern is dynamic, exposing us to multiple types of  
355 antibiotics, and even pesticides, in our daily lives. Future research should investigate the  
356 effects of other antibiotics at residual amounts and combination of different antibiotics  
357 to better reflect real-life conditions.

358 In conclusion, tylosin at ADI and TMDI doses, which are generally regarded as  
359 harmless, was shown to promote increased body weight, fat mass, and insulin resistance  
360 index in HFD-fed mice, and alter the gut microbiota composition. Moreover, altered gut  
361 microbiota was found to be critical for tylosin TMDI-induced metabolic consequences.  
362 Early-life exposure to TMDI dose of tylosin is sufficient to induce metabolic disorders,  
363 alter the abundance of specific bacteria related to host metabolic homeostasis, and  
364 modify the SCFA and bile acid composition. Lastly, exposure to TMDI dose of tylosin,  
365 whether continuously or restricted in early life, was shown to support lasting metabolic  
366 consequences via the ileal FGF15/hepatic FGFR4 pathway. Taken together, these  
367 findings indicate that the permissible exposure level of antibiotic residue should be re-  
368 established while considering its impact on the gut microbiota, for which this study  
369 provides valuable clues.

## 370 **Materials and Methods**

### 371 *Antibiotic selection and dose calculation*

372 Tylosin was selected as a model antibiotic growth promoter because of its high  
373 consumption levels in the annual consumption of veterinary antibiotics (Bureau of  
374 Animal and Plant Health Inspection and Quarantine, 2014). The doses of ADI and  
375 TMDI were obtained from the World Health Organization Technical Report Series (49).  
376 The ADI dose is derived from no observed adverse effect level, which is the lowest  
377 concentration that generates an adverse effect in long-term toxicity studies. The TMDI  
378 is an estimate of dietary intake obtained by MRLs and the sum of average daily per  
379 capita consumption of each food commodity (5).

### 380 *Experimental design of the animal studies*

381 Animal experiments were performed with permission from the Institutional Animal  
382 Care and Use Committee of National Taiwan University (approval number: NTU-106-  
383 EL-051 and NALC 107-0-006-R2). All mice were purchased from the National  
384 Laboratory Animal Center (Taipei City, Taiwan).

#### 385 *I. Antibiotic residue exposure model (Fig. 1a)*

386 Pregnant mice were administered tylosin at the doses of ADI (0.37 mg/kg) and TMDI  
387 (0.047 mg/kg) through drinking water from day 10 of gestation. Control mice (CON)  
388 did not receive antibiotics. After the offspring were weaned, they were randomly  
389 divided into normal chow diet (NCD) (MFG, Oriental Yeast, Japan) and high-fat diet  
390 (HFD, 60% kcal from fat) (D12492, Research Diets, New Brunswick, NJ, USA). Body  
391 composition was measured at 8, 12, and 17 weeks. The metabolic measurements and  
392 OGTT were performed before euthanizing the mice at 20 weeks. After euthanasia the



393 mice, the blood and tissue samples were collected and stored at  $-80^{\circ}\text{C}$ .

#### 394 *II. Fecal microbial transplantation study (Fig. 4a)*

395 Eight-week-old C57BL/6 germ-free mice were randomly divided into fecal microbiota  
396 transplantation-control (FMT-CON) and FMT-TMDI groups, which were transplanted  
397 with the fecal microbiota from HFD-CON and HFD-TMDI mice, respectively. After  
398 FMT, the recipient mice were housed in two independent isolators and fed with  
399 irradiated HFD until 20 weeks of age. Before the recipient mice were euthanized, the  
400 body composition analysis and OGTT were performed.

#### 401 *III. Early-life exposure model (Fig. 5a)*

402 The mice were divided into three groups: CON, feeding condition was the same as  
403 HFD-CON; Early-TMDI, exposure duration was limited during gestation and lactation  
404 period; Cont-TMDI, feeding condition was the same as HFD-TMDI. The experiment  
405 started on day 10 of gestation. Before the mice were weaned, both Early-TMDI and  
406 Cont-TMDI mice were exposed to TMDI dose of tylosin. After weaning, only the Cont-  
407 TMDI mice were continuously exposed to tylosin through the drinking water. Body  
408 composition was measured at 5, 10, 15, and 20 weeks. The OGTT was performed  
409 before euthanizing the mice at 20 weeks.

#### 410 ***Body composition analysis***

411 Body composition was determined using Minispec LF50 TD-NMR Body Composition  
412 Analyzer (Bruker, Billerica, MA, USA), which provides the measurement of body  
413 weight, and lean and fat mass. The relative fat mass was calculated as fat mass (g)/body  
414 weight (g) ratio.

415 ***Glucose and insulin sensitivity***

416 For the OGTT, mice were deprived of food for 5 h. Blood was collected from the  
417 submandibular vein, and the glucose levels were measured by the glucometer (Roche,  
418 Basel, Switzerland) at 0, 15, 30, 60, 90, and 120 min after oral administration with 2  
419 g/kg glucose. The fasting insulin levels were detected by an enzyme-linked  
420 immunosorbent assay (ELISA) kit (Mercodia, Uppsala, Sweden). The HOMA-IR index  
421 was calculated using the formula: fasting glucose (nmol/L) × fasting insulin  
422 ( $\mu$ U/mL)/22.5 (50).

423 ***Histopathological analysis of liver and adipose tissue***

424 Liver and adipose tissue sections were dissected and fixed in 10% formalin solution.  
425 Histopathological analysis was performed by the formalin-fixed, paraffin-embedded,  
426 and hematoxylin and eosin (H&E)-stained slide. The fatty liver score was estimated by  
427 a pathologist as previously described (51). The fatty liver score included the evaluation  
428 of steatosis (macrovesicular, microvesicular, and hypertrophy) and inflammation  
429 (number of inflammatory foci). The visceral adipocyte quantification was performed by  
430 HCLImage Live software (HCLImage, Sewickley, PA, USA).

431 ***Obesity index***

432 The obesity index was extracted from multidimensional phenotype measurements of  
433 mice, including total fat mass (g), body fat (%), average growth rate, weights of adipose  
434 tissues and liver, fatty liver score, fasting glucose, fasting insulin, HOMA-IR index,  
435 fasting triglycerides and fasting total cholesterol based on a principal component  
436 analysis algorithm (30).

437 ***Statistical analysis***

438 Data were represented as mean  $\pm$  standard deviation (SD) or mean  $\pm$  standard error of  
439 the mean (SEM). One-way analysis of variance (ANOVA) with Tukey's range test or  
440 Student's *t*-test was applied for intergroup comparisons. Statistical assessment of the gut  
441 microbiome, SCFAs, and bile acids was performed using the Kruskal–Wallis  
442 with/without false discovery rate or one-way ANOVA with Tukey's range test. All  
443 statistical data were analyzed using Prism software (version 8.4.3; GraphPad Software,  
444 San Diego, CA, USA) or RStudio (version 1.2.5001, RStudio, Boston, MA, USA).  
445

446 **Acknowledgements:** This study was funded by the Ministry of Science and Technology  
447 (MOST), Taiwan (MOST 106-3114-B-002-003, MOST 107-2321-B-002-039, MOST 108-  
448 2321-B-002-051, MOST 109-2327-B-002-005, and MOST 109-2314-B-002-064-MY3). We  
449 would like to acknowledge the technical support provided by the following institutes: Fecal  
450 microbiota transplantation, isolator service and metabolic measurement were conducted by  
451 National Laboratory Animal Center, National Applied Research Laboratories, Taiwan. Analysis  
452 of bile acids was supported by the National Taiwan University Consortia of Key  
453 Technologies. Analysis of short chain fatty acid was supported by the ‘Center of Precision  
454 Medicine’ from The Featured Areas Research Center Program by the MOST. Body composition  
455 analysis was performed by Taiwan Mouse Clinic, Academia Sinica and Taiwan Animal  
456 Consortium.

457 **Author contributions:** R.A.C. designed and performed the animal study, performed  
458 metabolomic, bioinformatics, and statistical analysis, and drafted the manuscript; W.K.W.  
459 proposed, designed, and instructed the study; S.P. assisted the experiments and bioinformatics  
460 analysis; P.Y.L. instructed the bioinformatics analysis; H.L.C. performed the germ-free mice  
461 study and assisted the metabolic measurement; Y.H.C. assisted the germ-free animal study and  
462 performed the LPS analysis; Q.L. instructed the bile acid analysis; H.C.H. and H.B.Z.  
463 performed SCFA analysis and assisted with mass spectrometry analysis; T.L.L. instructed the  
464 LPS analysis; Y.T.Y. conducted the PCR and library preparation for *16S* rRNA sequencing;  
465 H.S.H. and Y.E.L. instructed the western blotting; S.P., T.C.D.S., W.K.W., P.Y.L. and L.Y.S.  
466 critically revised the manuscript; W.K.W., L.Y.S., C.C.H., M.S.W., H.C.L., C.C.C. and C.T.H.,  
467 provided professional insights, techniques, and relevant resources for the study.

468 **Data availability:** The raw *16s* rRNA sequencing data are accessible at the National Center for  
469 Biotechnology Information Short Read Archive (BioProject: PRJNA715326).

470 **Disclosure of interest:** The authors declare that the research was conducted in the absence of  
471 any commercial or financial relationships that could be construed as a potential conflict of  
472 interest.  
473

## 474 References

- 475 1. Brown K, Uwiera RRE, Kalmokoff ML, Brooks SPJ, Inglis GD. 2017. Antimicrobial  
476 growth promoter use in livestock: a requirement to understand their modes of action to  
477 develop effective alternatives. *Int J Antimicrob Agents* 49:12-24.
- 478 2. Brussow H. 2015. Growth promotion and gut microbiota: insights from antibiotic use.  
479 *Environ Microbiol* 17:2216-27.
- 480 3. Riley LW, Raphael E, Faerstein E. 2013. Obesity in the United States - dysbiosis from  
481 exposure to low-dose antibiotics? *Front Public Health* 1:69.
- 482 4. Ryan AM. 2013. Preserving Antibiotics, Rationally. *N Engl J Med* 369:2472-4.
- 483 5. WHO. 2009. Principles and methods for the risk assessment of chemicals in food.  
484 *Environmental Health Criteria* 70 240.
- 485 6. Wang H, Wang N, Wang B, Zhao Q, Fang H, Fu C, Tang C, Jiang F, Zhou Y, Chen Y,  
486 Jiang Q. 2016. Antibiotics in Drinking Water in Shanghai and Their Contribution to  
487 Antibiotic Exposure of School Children. *Environ Sci Technol* 50:2692-9.
- 488 7. Li N, Ho KWK, Ying GG, Deng WJ. 2017. Veterinary antibiotics in food, drinking  
489 water, and the urine of preschool children in Hong Kong. *Environ Int* 108:246-252.
- 490 8. Ji K, Kho Y, Park C, Paek D, Ryu P, Paek D, Kim M, Kim P, Choi K. 2010. Influence  
491 of water and food consumption on inadvertent antibiotics intake among general  
492 population. *Environ Res* 110:641-9.
- 493 9. Wang H, Ren L, Yu X, Hu J, Chen Y, He G, Jiang Q. 2017. Antibiotic residues in meat,  
494 milk and aquatic products in Shanghai and human exposure assessment. *Food Control*  
495 80:217-225.
- 496 10. Wang H, Wang N, Wang B, Fang H, Fu C, Tang C, Jiang F, Zhou Y, He G, Zhao Q,  
497 Chen Y, Jiang Q. 2016. Antibiotics detected in urines and adipogenesis in school  
498 children. *Environ Int* 89-90:204-11.
- 499 11. Cani PD, Van Hul M, Lefort C, Depommier C, Rastelli M, Everard A. 2019. Microbial  
500 regulation of organismal energy homeostasis. *Nat Metab* 1:34-46.
- 501 12. Fan Y, Pedersen O. 2021. Gut microbiota in human metabolic health and disease. *Nat*  
502 *Rev Microbiol* 19:55-71.
- 503 13. Agus A, Clement K, Sokol H. 2020. Gut microbiota-derived metabolites as central  
504 regulators in metabolic disorders. *Gut* doi:10.1136/gutjnl-2020-323071.
- 505 14. Vrieze A, Out C, Fuentes S, Jonker L, Reuling I, Kootte RS, van Nood E, Holleman F,  
506 Knaapen M, Romijn JA, Soeters MR, Blaak EE, Dallinga-Thie GM, Reijnders D,  
507 Ackermans MT, Serlie MJ, Knop FK, Holst JJ, van der Ley C, Kema IP, Zoetendal EG,  
508 de Vos WM, Hoekstra JB, Stoes ES, Groen AK, Nieuwdorp M. 2014. Impact of oral  
509 vancomycin on gut microbiota, bile acid metabolism, and insulin sensitivity. *J Hepatol*  
510 60:824-31.
- 511 15. Zarrinpar A, Chaix A, Xu ZZ, Chang MW, Marotz CA, Saghatelian A, Knight R, Panda  
512 S. 2018. Antibiotic-induced microbiome depletion alters metabolic homeostasis by  
513 affecting gut signaling and colonic metabolism. *Nat Commun* 9:2872.
- 514 16. Reijnders D, Goossens GH, Hermes GD, Neis EP, van der Beek CM, Most J, Holst JJ,  
515 Lenaerts K, Kootte RS, Nieuwdorp M, Groen AK, Olde Damink SW, Boekschoten  
516 MV, Smidt H, Zoetendal EG, Dejong CH, Blaak EE. 2016. Effects of Gut Microbiota  
517 Manipulation by Antibiotics on Host Metabolism in Obese Humans: A Randomized  
518 Double-Blind Placebo-Controlled Trial. *Cell Metab* 24:341.
- 519 17. Ianiro G, Tilg H, Gasbarrini A. 2016. Antibiotics as deep modulators of gut microbiota:  
520 between good and evil. *Gut* 65:1906-1915.
- 521 18. Cox LM, Yamanishi S, Sohn J, Alekseyenko AV, Leung JM, Cho I, Kim SG, Li H, Gao  
522 Z, Mahana D, Zarate Rodriguez JG, Rogers AB, Robine N, Loke P, Blaser MJ. 2014.  
523 Altering the intestinal microbiota during a critical developmental window has lasting  
524 metabolic consequences. *Cell* 158:705-721.
- 525 19. Azad MB, Bridgman SL, Becker AB, Kozyrskyj AL. 2014. Infant antibiotic exposure  
526 and the development of childhood overweight and central adiposity. *Int J Obes (Lond)*  
527 38:1290-8.

- 528 20. Chen LW, Xu J, Soh SE, Aris IM, Tint MT, Gluckman PD, Tan KH, Shek LP, Chong  
529 YS, Yap F, Godfrey KM, Gilbert JA, Karnani N, Lee YS. 2020. Implication of gut  
530 microbiota in the association between infant antibiotic exposure and childhood obesity  
531 and adiposity accumulation. *Int J Obes (Lond)* 44:1508-1520.
- 532 21. Mbakwa CA, Scheres L, Penders J, Mommers M, Thijs C, Arts IC. 2016. Early Life  
533 Antibiotic Exposure and Weight Development in Children. *J Pediatr* 176:105-113 e2.
- 534 22. Trasande L, Blustein J, Liu M, Corwin E, Cox LM, Blaser MJ. 2013. Infant antibiotic  
535 exposures and early-life body mass. *Int J Obes (Lond)* 37:16-23.
- 536 23. Ruiz VE, Battaglia T, Kurtz ZD, Bijmens L, Ou A, Engstrand I, Zheng X, Iizumi T,  
537 Mullins BJ, Muller CL, Cadwell K, Bonneau R, Perez-Perez GI, Blaser MJ. 2017. A  
538 single early-in-life macrolide course has lasting effects on murine microbial network  
539 topology and immunity. *Nat Commun* 8:518.
- 540 24. Nobel YR, Cox LM, Kirigin FF, Bokulich NA, Yamanishi S, Teitler I, Chung J, Sohn J,  
541 Barber CM, Goldfarb DS, Raju K, Abubucker S, Zhou Y, Ruiz VE, Li H, Mitreva M,  
542 Alekseyenko AV, Weinstock GM, Sodergren E, Blaser MJ. 2015. Metabolic and  
543 metagenomic outcomes from early-life pulsed antibiotic treatment. *Nat Commun*  
544 6:7486.
- 545 25. Livanos AE, Greiner TU, Vangay P, Pathmasiri W, Stewart D, McRitchie S, Li H,  
546 Chung J, Sohn J, Kim S, Gao Z, Barber C, Kim J, Ng S, Rogers AB, Sumner S, Zhang  
547 XS, Cadwell K, Knights D, Alekseyenko A, Backhed F, Blaser MJ. 2016. Antibiotic-  
548 mediated gut microbiome perturbation accelerates development of type 1 diabetes in  
549 mice. *Nat Microbiol* 1:16140.
- 550 26. Schulfer AF, Schluter J, Zhang Y, Brown Q, Pathmasiri W, McRitchie S, Sumner S, Li  
551 H, Xavier JB, Blaser MJ. 2019. The impact of early-life sub-therapeutic antibiotic  
552 treatment (STAT) on excessive weight is robust despite transfer of intestinal microbes.  
553 *ISME J* 13:1280-1292.
- 554 27. Cho I, Yamanishi S, Cox L, Methe BA, Zavadil J, Li K, Gao Z, Mahana D, Raju K,  
555 Teitler I, Li H, Alekseyenko AV, Blaser MJ. 2012. Antibiotics in early life alter the  
556 murine colonic microbiome and adiposity. *Nature* 488:621-6.
- 557 28. Cerniglia CE, Pineiro SA, Kotarski SF. 2016. An update discussion on the current  
558 assessment of the safety of veterinary antimicrobial drug residues in food with regard to  
559 their impact on the human intestinal microbiome. *Drug Test Anal* 8:539-48.
- 560 29. WHO. 1987. Principles for the safety assessment of food additives and contaminants in  
561 food. *Environmental Health Criteria* 70.
- 562 30. Mahana D, Trent CM, Kurtz ZD, Bokulich NA, Battaglia T, Chung J, Muller CL, Li H,  
563 Bonneau RA, Blaser MJ. 2016. Antibiotic perturbation of the murine gut microbiome  
564 enhances the adiposity, insulin resistance, and liver disease associated with high-fat  
565 diet. *Genome Med* 8:48.
- 566 31. d'Hennezel E, Abubucker S, Murphy LO, Cullen TW. 2017. Total Lipopolysaccharide  
567 from the Human Gut Microbiome Silences Toll-Like Receptor Signaling. *mSystems* 2.
- 568 32. Lam YY, Ha CW, Campbell CR, Mitchell AJ, Dinudom A, Oscarsson J, Cook DI, Hunt  
569 NH, Caterson ID, Holmes AJ, Storlien LH. 2012. Increased gut permeability and  
570 microbiota change associate with mesenteric fat inflammation and metabolic  
571 dysfunction in diet-induced obese mice. *PLoS One* 7:e34233.
- 572 33. Jia W, Wei M, Rajani C, Zheng X. 2020. Targeting the alternative bile acid synthetic  
573 pathway for metabolic diseases. *Protein Cell* doi:10.1007/s13238-020-00804-9.
- 574 34. Jia W, Xie G, Jia W. 2018. Bile acid-microbiota crosstalk in gastrointestinal  
575 inflammation and carcinogenesis. *Nat Rev Gastroenterol Hepatol* 15:111-128.
- 576 35. Sachdev S, Wang Q, Billington C, Connett J, Ahmed L, Inabnet W, Chua S,  
577 Ikramuddin S, Korner J. 2016. FGF 19 and Bile Acids Increase Following Roux-en-Y  
578 Gastric Bypass but Not After Medical Management in Patients with Type 2 Diabetes.  
579 *Obes Surg* 26:957-65.
- 580 36. Degirolamo C, Rainaldi S, Bovenga F, Murzilli S, Moschetta A. 2014. Microbiota  
581 modification with probiotics induces hepatic bile acid synthesis via downregulation of  
582 the Fxr-Fgf15 axis in mice. *Cell Rep* 7:12-8.

- 583 37. Ge H, Zhang J, Gong Y, Gupte J, Ye J, Weizmann J, Samayoa K, Coberly S, Gardner  
584 J, Wang H, Corbin T, Chui D, Baribault H, Li Y. 2014. Fibroblast growth factor  
585 receptor 4 (FGFR4) deficiency improves insulin resistance and glucose metabolism  
586 under diet-induced obesity conditions. *J Biol Chem* 289:30470-80.
- 587 38. Potthoff MJ, Boney-Montoya J, Choi M, He T, Sunny NE, Satapati S, Suino-Powell K,  
588 Xu HE, Gerard RD, Finck BN, Burgess SC, Mangelsdorf DJ, Kliewer SA. 2011.  
589 FGF15/19 regulates hepatic glucose metabolism by inhibiting the CREB-PGC-1alpha  
590 pathway. *Cell Metab* 13:729-38.
- 591 39. Brown K, Zaytsoff SJ, Uwiera RR, Inglis GD. 2016. Antimicrobial growth promoters  
592 modulate host responses in mice with a defined intestinal microbiota. *Sci Rep* 6:38377.
- 593 40. Insenser M, Murri M, Del Campo R, Martinez-Garcia MA, Fernandez-Duran E,  
594 Escobar-Morreale HF. 2018. Gut Microbiota and the Polycystic Ovary Syndrome:  
595 Influence of Sex, Sex Hormones, and Obesity. *J Clin Endocrinol Metab* 103:2552-2562.
- 596 41. Menni C, Jackson MA, Pallister T, Steves CJ, Spector TD, Valdes AM. 2017. Gut  
597 microbiome diversity and high-fibre intake are related to lower long-term weight gain.  
598 *Int J Obes (Lond)* 41:1099-1105.
- 599 42. Matamoros S, Gras-Leguen C, Le Vacon F, Potel G, de La Cochetiere MF. 2013.  
600 Development of intestinal microbiota in infants and its impact on health. *Trends*  
601 *Microbiol* 21:167-73.
- 602 43. Zeissig S, Blumberg RS. 2014. Life at the beginning: perturbation of the microbiota by  
603 antibiotics in early life and its role in health and disease. *Nat Immunol* 15:307-10.
- 604 44. Heimann E, Nyman M, Palbrink AK, Lindkvist-Petersson K, Degerman E. 2016.  
605 Branched short-chain fatty acids modulate glucose and lipid metabolism in primary  
606 adipocytes. *Adipocyte* 5:359-368.
- 607 45. Canfora EE, Jocken JW, Blaak EE. 2015. Short-chain fatty acids in control of body  
608 weight and insulin sensitivity. *Nat Rev Endocrinol* 11:577-91.
- 609 46. Belgaumkar AP, Vincent RP, Carswell KA, Hughes RD, Alaghband-Zadeh J, Mitry  
610 RR, le Roux CW, Patel AG. 2016. Changes in Bile Acid Profile After Laparoscopic  
611 Sleeve Gastrectomy are Associated with Improvements in Metabolic Profile and Fatty  
612 Liver Disease. *Obes Surg* 26:1195-202.
- 613 47. Ahlin S, Cefalo C, Bondia-Pons I, Capristo E, Marini L, Gastaldelli A, Mingrone G,  
614 Nolan JJ. 2019. Bile acid changes after metabolic surgery are linked to improvement in  
615 insulin sensitivity. *Br J Surg* 106:1178-1186.
- 616 48. Shin DJ, Osborne TF. 2009. FGF15/FGFR4 integrates growth factor signaling with  
617 hepatic bile acid metabolism and insulin action. *J Biol Chem* 284:11110-20.
- 618 49. WHO. 2008. Evaluation of certain veterinary drug residues in food. WHO Technical  
619 Report Series 954.
- 620 50. Matthews DR, Hosker JP, Rudenski AS, Naylor BA, Treacher DF, Turner RC. 1985.  
621 Homeostasis model assessment: insulin resistance and beta-cell function from fasting  
622 plasma glucose and insulin concentrations in man. *Diabetologia* 28:412-9.
- 623 51. Liang W, Menke AL, Driessen A, Koek GH, Lindeman JH, Stoop R, Havekes LM,  
624 Kleemann R, van den Hoek AM. 2014. Establishment of a general NAFLD scoring  
625 system for rodent models and comparison to human liver pathology. *PLoS One*  
626 9:e115922.  
627



628 **Figures**

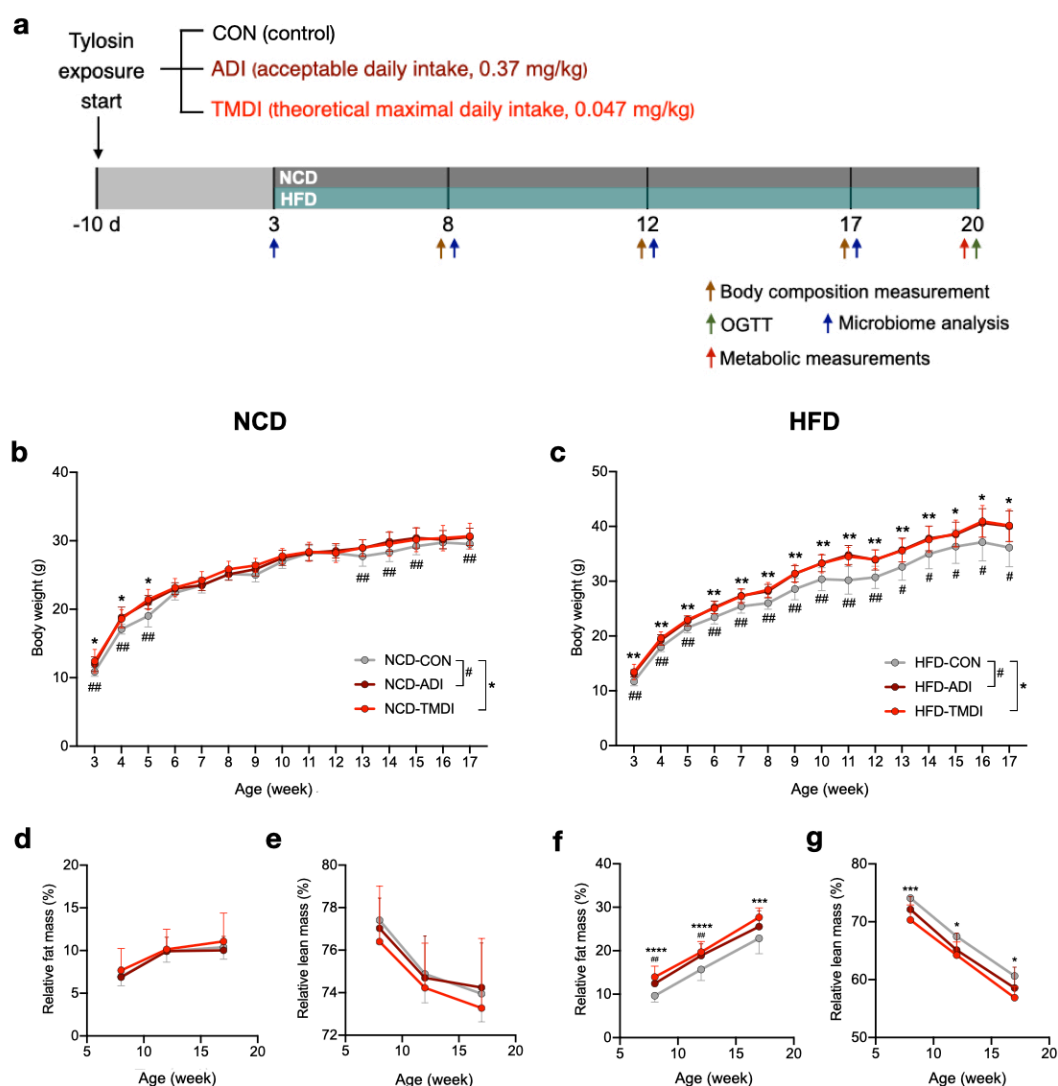

629

630 **FIG 1 | Residual dose of tylosin facilitates HFD-induced obesity.** (a) Experimental  
 631 design of antibiotic residue exposure model. Body weight, relative fat mass, and relative  
 632 lean mass changes in (b, d, e) NCD and (c, f, g) HFD mice. Data are expressed as mean  
 633  $\pm$  SD (n = 10–12). NCD-CON versus NCD-ADI and HFD-CON versus HFD-ADI (#*p* <  
 634 0.05; and ##*p* < 0.01) and NCD-CON versus NCD-TMDI and HFD-CON versus HFD-  
 635 TMDI (\**p* < 0.05; \*\**p* < 0.01; and \*\*\**p* < 0.001) by one-way ANOVA with Tukey’s  
 636 range test. Abbreviations: ADI, acceptable daily intake; AUC, area under curve; CON,  
 637 control; HFD, high-fat diet; HOMA-IR, homeostatic model assessment of insulin  
 638 resistance; NCD, normal chow diet; OGTT, oral glucose tolerance test; TMDI,  
 639 theoretical maximum daily intake.

640

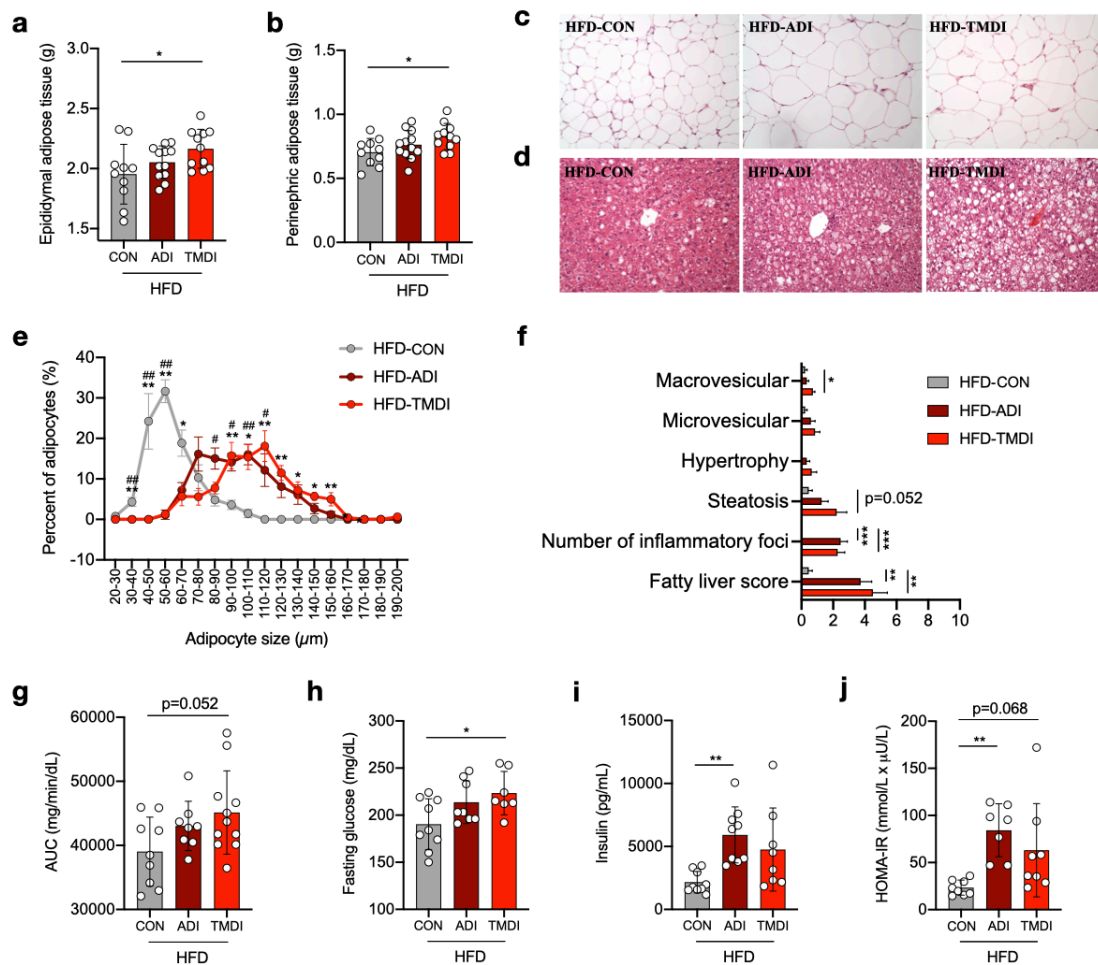

641

642 **FIG 2 | Residual dose of tylosin causes adiposity and insulin resistance. (a)** Weight  
 643 of epididymal adipose tissue. **(b)** Weight of perinephric adipose tissue. **(c-d)**  
 644 histological features of H&E stained in **(c)** epididymal adipose tissue and **(d)** liver. **(e)**  
 645 Adipocyte diameter of epididymal adipose tissue. **(f)** Fatty liver score including  
 646 steatosis (macrovesicular, microvesicular, and hypertrophy) and inflammation (number  
 647 of inflammatory foci). **(g)** Area under curve (AUC) derived from the OGTT. **(h)** Plasma  
 648 glucose and **(i)** insulin level after overnight fasting. **(j)** HOMA-IR index represented as  
 649 an indicator of insulin resistance. Data are expressed as mean  $\pm$  SD ( $n = 8-12$  mice per  
 650 group). HFD-CON versus HFD-ADI ( $\#p < 0.05$  and  $\#\#p < 0.01$ ) and HFD-CON versus  
 651 HFD-TMDI ( $*p < 0.05$ ;  $**p < 0.01$ ; and  $***p < 0.001$ ) by one-way ANOVA with  
 652 Tukey's range test. Abbreviations: ADI, acceptable daily intake; AUC, area under  
 653 curve; CON, control; HFD, high-fat diet; HOMA-IR, homeostatic model assessment of  
 654 insulin resistance; NCD, normal chow diet; TMDI, theoretical maximum daily intake.  
 655

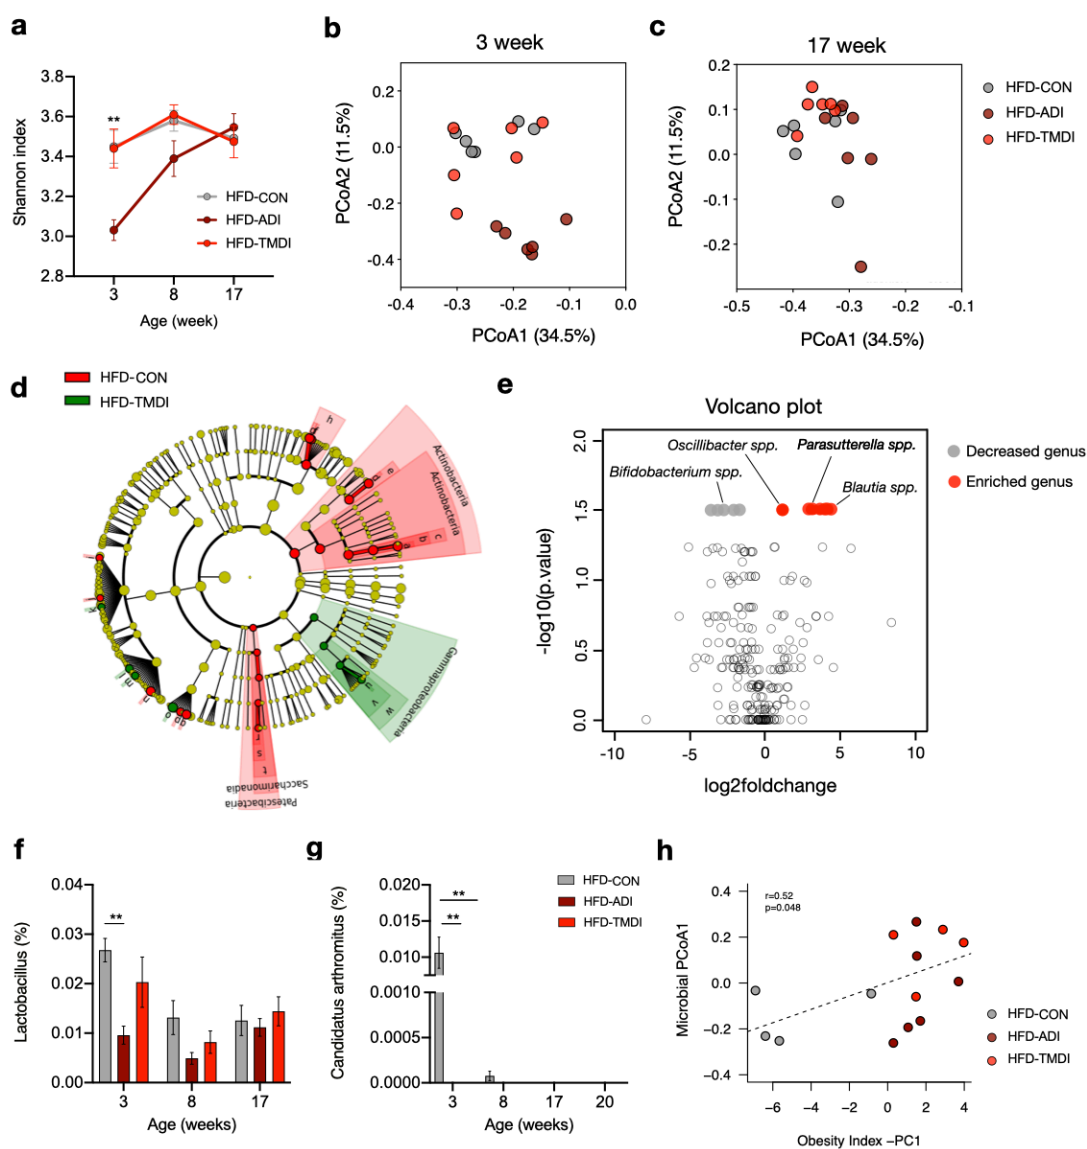

656

657 **FIG 3 | Residual dose of tylosin impacts on gut microbiota composition.** (a) Change  
 658 in Shannon index in 3, 8, 17 week-old mice. Principal coordinate analysis (PCoA) of  
 659 Bray-Curtis distances of the microbiota at (b) 3 week-old and (c) 17 week-old. (d)  
 660 Linear discriminant analysis effect size (LEfSe) showing enriched bacterial phyla. (e)  
 661 Volcano plot showing enriched and decreased bacterial genera in HFD-TMDI group.  
 662 Relative abundance of (f) *Lactobacillus* and (g) *Candidatus arthromitus*. (h)  
 663 Spearman's correlation of microbial PCoA1 index and the obesity index. Data are  
 664 expressed as mean  $\pm$  SEM (n = 8–12). \* $p < 0.05$  and \*\* $p < 0.01$  by Wilcoxon signed-  
 665 rank test.  $p$ -values of PCoA were assessed by ADONIS test. Abbreviations: ADI,  
 666 acceptable daily intake; CON, control; HFD, high-fat diet; TMDI, theoretical maximum  
 667 daily intake.

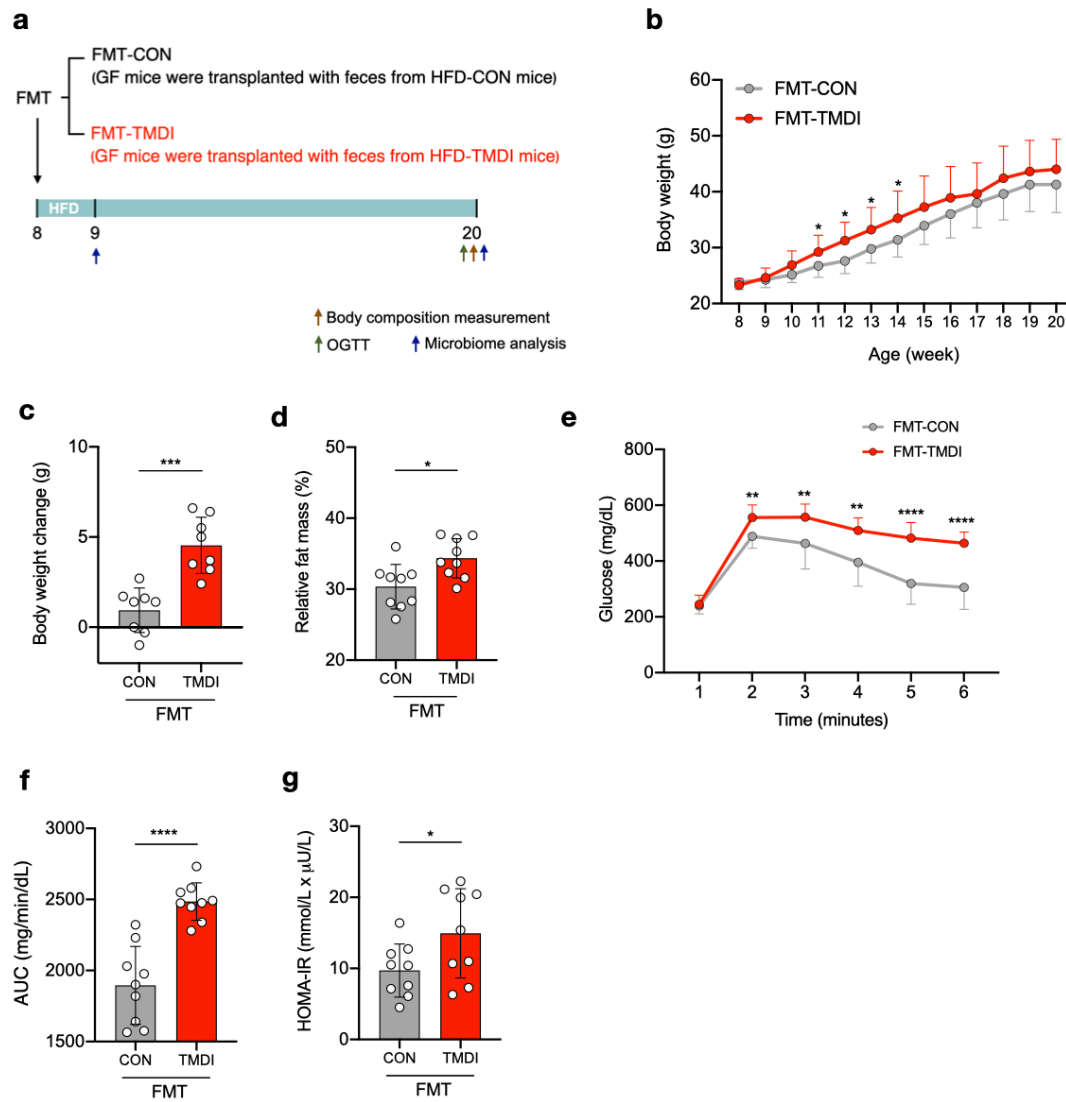

668

669 **FIG 4 | Fecal microbiota transplantation of HFD-TMDI feces induces obesity and**  
 670 **insulin resistance in germ-free mice. (a)** Experimental design of the FMT study. **(b)**  
 671 Body weight change. **(c)** Body weight change at 2 weeks after FMT (from 8–10 weeks  
 672 of age). **(d)** Body fat mass at 20 weeks of age. **(e)** Plasma glucose profile measured  
 673 during the OGTT. **(f)** AUC derived from the OGTT. **(g)** HOMA-IR index. Data are  
 674 expressed as mean ± SD (n = 8–10). \* $p < 0.05$ ; \*\* $p < 0.01$ ; \*\*\* $p < 0.001$ ; and \*\*\*\* $p <$   
 675  $0.0001$  by un-paired  $t$ -test. Abbreviations: AUC, area under curve; CON, control; FMT,  
 676 fecal microbiota transplantation; HOMA-IR, homeostatic model assessment of insulin  
 677 resistance; OGTT, oral glucose tolerance test; TMDI, theoretical maximum daily intake.  
 678

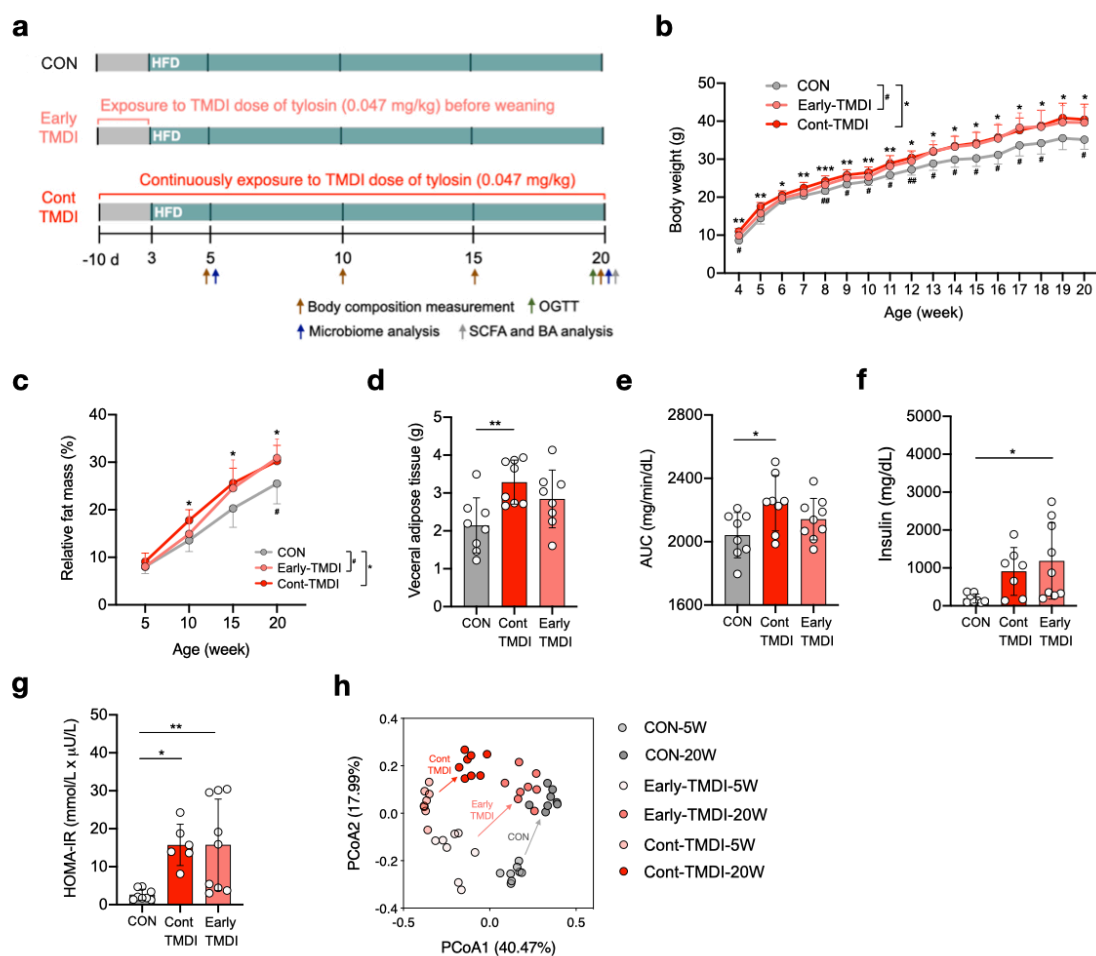

679

680 **FIG 5 | Early-life exposure of TMDI dose of tylosin induces metabolic disorders.**

681 **(a)** Experimental design of the early life exposure model. **(b)** Body weight change. **(c)**  
 682 Relative fat mass. **(d)** Weight of visceral adipose tissue. **(e)** AUC derived from the  
 683 OGTT. **(f)** Insulin level after overnight fasting. **(g)** HOMA-IR index. **(h)** PCoA of Bray-  
 684 Curtis distances of the microbiota at 5 and 20 weeks of age. Data are expressed as mean  
 685  $\pm$  SD ( $n = 6-10$ ). Statistical analysis of **(b)** and **(c)** were performed by one-way  
 686 ANOVA with Tukey's range test comparing CON versus Early-TMDI ( $\#p < 0.05$  and  
 687  $\#\#p < 0.01$ ) or CON versus Cont-TMDI ( $*p < 0.05$ ;  $**p < 0.01$ ; and  $***p < 0.001$ ) at  
 688 each time point. Statistical analyses of **(d-g)** were performed by one-way ANOVA with  
 689 Tukey's range test ( $*p < 0.05$  and  $**p < 0.01$ ).  $p$ -values of PCoA **(h)** were assessed by  
 690 ADONIS test. Abbreviations: AUC, area under curve; BA, bile acid; CON, control;  
 691 HFD, high-fat diet; HOMA-IR, homeostatic model assessment of insulin resistance;  
 692 OGTT, oral glucose tolerance test; SCFA, short-chain fatty acid; TMDI, theoretical  
 693 maximum daily intake. Treatment regimen: Cont-TMDI, continuous exposure to TMDI  
 694 dose of tylosin; Early-TMDI, exposure to TMDI dose of tylosin early in life.

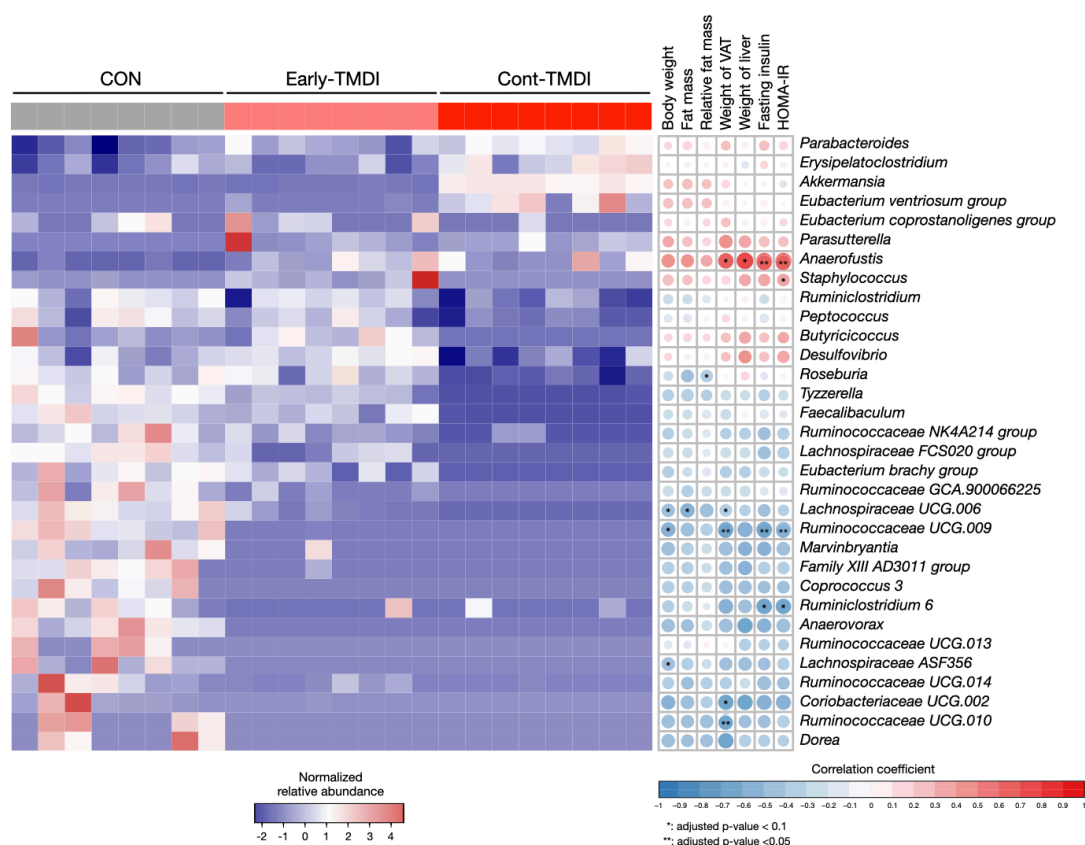

695

696 **FIG 6 | TMDI of tylosin alters the abundance of specific bacteria with correlation**  
 697 **to host metabolic phenotype. (Left panel)** Heatmap of significantly enriched or  
 698 reduced bacterial genera in CON, Early-TMDI, and Cont-TMDI groups, with genus  
 699 name shown to the right of each row. Log10-transformed relative abundance is scaled  
 700 and color-coded with index shown beneath the heatmap. Statistical analyses were  
 701 performed by Kruskal—Wallis test ( $q < 0.05$ ). **(Right panel)** Obesity and insulin  
 702 resistance-related phenotypes correlated with bacterial genera. The size and color of the  
 703 symbols represent the Spearman's correlation coefficients. Abbreviations: CON,  
 704 control; TMDI, theoretical maximum daily intake; VAT, visceral adipose tissue.  
 705 Treatment regimen: Cont-TMDI, continuous exposure to TMDI dose of tylosin; Early-  
 706 TMDI, exposure to TMDI dose of tylosin early in life.  
 707

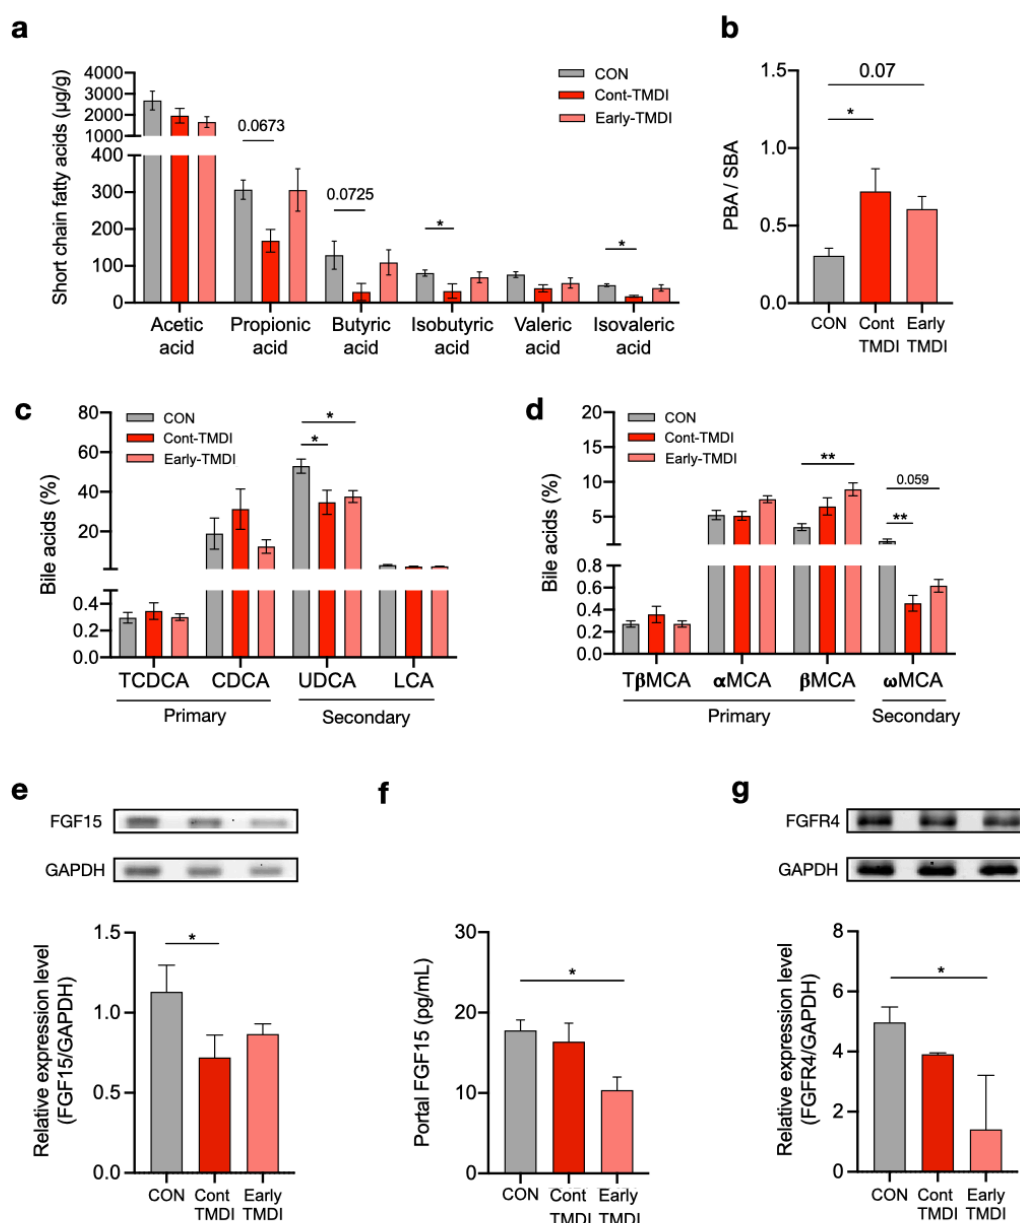

708

709 **FIG 7 | TMDI dose of tylosin decreases SCFA levels, increases PBA/SBA ratio, and**  
 710 **alters downstream expressions of FGF15 and FGFR4. (a)** Fecal SCFA levels. **(b)**  
 711 Ratio of PBA to SBA. **(c)** Levels of non-12-OH bile acids. **(d)** Levels of 12-OH bile  
 712 acids. **(e)** Western blotting of ileal FGF15 expression normalized to GAPDH. **(f)** FGF15  
 713 level in portal vein measured by enzyme-linked immunosorbent assay. **(g)** Western  
 714 blotting of hepatic FGFR4 level normalized to GAPDH. Data are presented by mean ±  
 715 SEM (n = 8–10) in **(a-d)** and mean ± SD (n = 4) in **(e-g)**. Statistical analyses were  
 716 performed by one-way ANOVA with Tukey's range test (\**p* < 0.05 and \*\**p* < 0.01).  
 717 Abbreviations: α-MCA, α-muricholic acid; β-MCA, β-muricholic acid; ω-MCA, ω-

718 muricholic acid; CON, control; CDCA, chnodeoxycholic acid; FGF15, fibroblast  
719 growth factor 15; FGFR4, fibroblast growth factor receptor 4; GAPDH, glyceraldehyde  
720 3-phosphate dehydrogenase; LCA, lithocholic acid; PBA, primary bile acid; SBA,  
721 secondary bile acid; T- $\beta$ -MCA, tauro-beta-muricholic acid; TCDCA,  
722 taurochenodeoxycholic acid; TMDI, theoretical maximum daily intake; UDCA,  
723 ursodeoxycholic acid. Treatment regimen: Cont-TMDI, continuous exposure to TMDI  
724 dose of tylosin; Early-TMDI, exposure to TMDI dose of tylosin early in life.  
725



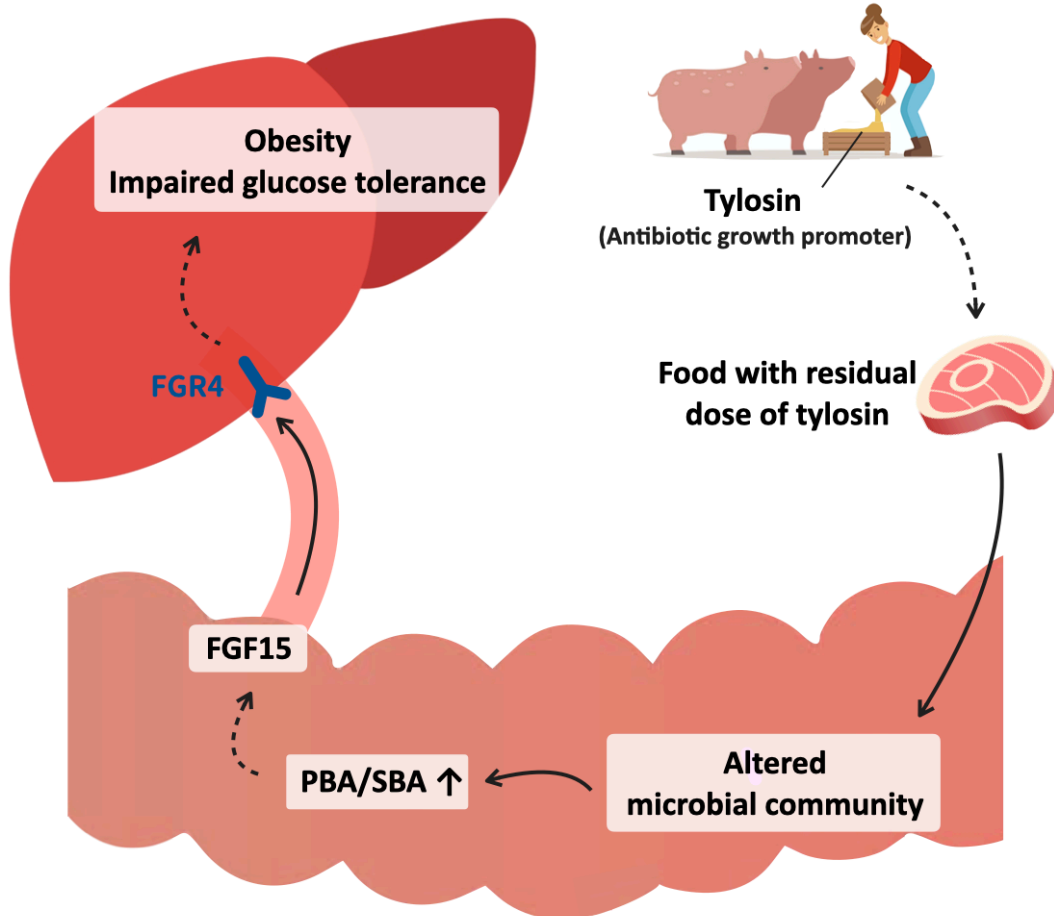

726

727 **FIG 8 | Residual dose of antibiotic growth promoter exacerbates HFD-induced**  
728 **metabolic disorder by altering the gut microbiota, microbial metabolites, and**  
729 **downstream signaling pathway.** Abbreviations: AGP, antibiotic growth promoter;  
730 FGF15, fibroblast growth factor 15; HFD; high fat diet; PBA, primary bile acid; SBA,  
731 secondary bile acid.
